# Supplementary material
Source: bioRxiv or medRxiv preprint supplement (https://medrxiv.org/highwire/filestream/76387/field_highwire_adjunct_files/0/2020.03.08.20030643-1.pdf)
Supplement: Supplementary file [file 2020.03.08.20030643-1.pdf]

1 **Transmission potential of COVID-19 in Iran**

2 **Technical Appendix**

3  
4 Authors: Kamalich Muniz-Rodriguez<sup>1</sup>, MPH, Isaac Chun-Hai Fung<sup>1\*</sup>, PhD, Shayesteh R. Ferdosi, PhD,  
5 Sylvia K. Ofori, MPH, Yiseul Lee, MPH, Amna Tariq, MPH, Gerardo Chowell\*, PhD

6 Affiliations: Jiann-Ping Hsu College of Public Health, Georgia Southern University (I. C.-H. Fung, K.  
7 Muniz-Rodriguez, S. K. Ofori), Brain Tumor Unit, The Translational Genomics Research Institute (S. R.  
8 Ferdosi), School of Public Health, Georgia State University (Y. Lee, A. Tariq, G. Chowell)

9 <sup>1</sup> These two individuals serve as co-first authors.

10 Correspondence should be addressed to: I. C. H. Fung, Department of Biostatistics, Epidemiology and  
11 Environmental Health Sciences, Jiann-Ping Hsu College of Public Health, Georgia Southern University.  
12 Telephone: 912-478-5079. Email: [cfung@georgiasouthern.edu](mailto:cfung@georgiasouthern.edu); G. Chowell, Department of Population  
13 Health Sciences, School of Public Health, Georgia State University. Telephone: 404-413-9322. Fax: 404-  
14 413-2344. Email: [gchowell@gsu.edu](mailto:gchowell@gsu.edu).

## 17 **Technical Appendix**

### 18 **Estimate of reproduction number from daily reported cases (Method 1)**

19 Using the daily curve of reported cases in Iran, we estimate the reproduction number of COVID-19 (Table  
20 S2, Figure S1). For this purpose, we first characterize the daily reported incidence using the generalized  
21 growth model (GGM) (1). This model characterizes the growth profile via two parameters: the growth rate  
22 parameter ( $r$ ) and the scaling of the growth rate parameter ( $p$ ). The model captures diverse epidemic profiles  
23 ranging from constant incidence ( $p = 0$ ), sub-exponential or polynomial growth ( $0 < p < 1$ ), and  
24 exponential growth ( $p = 1$ ) (1). The serial interval is assumed to follow a gamma distribution with a mean  
25 of 4.41 days and a standard deviation of 3.17 days based on recent reports (2, 3).

26 Next, to estimate the most recent estimate of  $R_t$ , we simulate the progression of incident reported cases from  
27 the calibrated GGM, and apply the discretized probability distribution ( $\rho_i$ ) of the serial interval using the  
28 renewal equation (4-6) given by

$$29 \quad R_{t_i} = \frac{I_i}{\sum_{j=0}^i (t_i - j) \rho_i}.$$

30 In the renewal equation we denote the total incidence at calendar time  $t_i$  by  $I_i$ . Here, the denominator  
31 represents the total number of cases that contribute to the incidence cases at time  $t_i$ . Next, we estimate  
32  $R_t$  from 300 simulated curves assuming a Poisson error structure to derive the uncertainty bounds around  
33 our estimate of the reproduction number (7) (Table S4).

### 34 **Estimate of reproduction number from epidemic doubling times (Method 2)**

35 We ran simulation to generate 10,000 sets of estimates of epidemic doubling times for a given time series  
36 of cumulative number of reported cases (Table S3), and to compute the arithmetic mean of each set. Then,  
37 the harmonic mean of these estimates was calculated across 10,000 sets of simulations and was reported as  
38 our estimated epidemic doubling time, with 95% confidence interval (Table S5).

39 Next, we drew 10,000 random values for the serial interval from a gamma distribution with a mean of 4.41

40 days and a standard deviation of 3.17 days (2, 3). We generate 10,000 values for the reproduction number  
41 by calculating the reproduction number for each pair of values (arithmetic mean of epidemic doubling time  
42 and serial interval respectively) following the equation as in Vynnycky and White (8), Table 4.1, Equation  
43 4.14:

$$44 \quad \text{Reproduction number} = 1 + \text{growth rate} \times \text{serial interval}$$

45 We reported the mean and 95% confidence intervals (CI) of the 10,000 estimated values of the reproduction  
46 number (Table S5).

### 47 **Results for Regions of Iran**

48 Iran is geographically arranged into five regions, each of which contains a number of provinces (see Table  
49 S1). In addition to estimating the reproduction number of COVID-19 across Iran, we further analyzed the  
50 data for each of the five regions of Iran.

51 Tables S4 and S5, and Figures S2 to S8, present our estimates for Regions 1 to 5 using Methods 1 and 2.  
52 The estimates obtained from Method 1 had a smaller variance. The estimates obtained from Method 2 had  
53 a larger variance, given the large variance of the serial interval estimate that we used. Given that the 95%  
54 CIs of our reproduction number estimates obtained via Method 2 were large, they overlapped with those  
55 obtained via Method 1.

56 From February 19 through March 1, it appeared that whether it was for Iran as a whole, or for its five  
57 regions, the point estimate of the estimated basic reproduction number for each region was 2.0 or higher  
58 before the effect of social distancing interventions kicked in. From March 6 through 19, the effective  
59 reproduction number for each region had dropped to a range from 1.48 of Region 3 to 1.77 of Region 5.  
60 However, the 95% CI of each region's estimate does not overlap with 1. Therefore, the transmission of  
61 SARS-CoV-2 (that causes COVID-19) remains active in all 5 regions of Iran (as effective reproduction  
62 number >1) before the Persian New Year Day of March 20, 2020.

63 **This study in the context of recent pre-print literature on the 2020 COVID-19 epidemic in Iran**

64 On April 2, 2020, we searched for “COVID-19” and “Iran” on medRXiv pre-print servers and identified 6  
65 manuscripts that fit mathematical or statistical models to COVID-19 case count data obtained via official  
66 Iranian reports. See Table S6 for a summary. Three of these papers provide reproduction number estimates  
67 (9-11). Our estimates of the basic reproduction number are comparable to theirs. These three papers also  
68 identified a lower effective reproduction number for the Iranian epidemic once social distancing  
69 interventions kicked in. However, only one paper suggested that the effective reproduction number has  
70 dropped below unity by March 20, 2020 (10). The other two estimated an effective reproduction number  
71  $>1$  (9, 11), that is consistent with our results.

72 **References**

- 73 1. Viboud C, Simonsen L, Chowell G. A generalized-growth model to characterize the early ascending  
74 phase of infectious disease outbreaks. *Epidemics*. 2016 2016/06/01/;15:27-37.
- 75 2. Nishiura H, Linton NM, Akhmetzhanov AR. Serial interval of novel coronavirus (2019-nCoV)  
76 infections. *medRxiv*. 2020:2020.02.03.20019497.
- 77 3. You C, Deng Y, Hu W, Sun J, Lin Q, Zhou F, et al. Estimation of the Time-Varying Reproduction  
78 Number of COVID-19 Outbreak in China. *medRxiv*. 2020:2020.02.08.20021253.
- 79 4. Nishiura H, Chowell G. Early transmission dynamics of Ebola virus disease (EVD), West Africa,  
80 March to August 2014. *Euro Surveill*. 2014 Sep 11;19(36).
- 81 5. H. Nishiura GC. The Effective Reproduction Number as a Prelude to Statistical Estimation of Time-  
82 Dependent Epidemic Trends; 2009.
- 83 6. Paine S, Mercer GN, Kelly PM, Bandaranayake D, Baker MG, Huang QS, et al. Transmissibility  
84 of 2009 pandemic influenza A(H1N1) in New Zealand: effective reproduction number and influence of age,  
85 ethnicity and importations. *Euro Surveill*. 2010 Jun 17;15(24).
- 86 7. Chowell G. Fitting dynamic models to epidemic outbreaks with quantified uncertainty: A primer  
87 for parameter uncertainty, identifiability, and forecasts. *Infectious Disease Modelling*. 2017;2(3):379-98.
- 88 8. Vynnycky E, White RG. *An Introduction to Infectious Disease Modelling*. Oxford: Oxford  
89 University Press; 2010.
- 90 9. Ahmadi A, Fadaei Y, Shirani M, Rahmani F. Modeling and Forecasting Trend of COVID-19  
91 Epidemic in Iran. *medRxiv*. 2020:2020.03.17.20037671.
- 92 10. Ghaffarzadegan N, Rahmandad H. Simulation-based Estimation of the Spread of COVID-19 in  
93 Iran. *medRXiv*. 2020:2020.03.22.20040956.
- 94 11. Sahafizadeh E, Sartoli S. Estimating the reproduction number of COVID-19 in Iran using epidemic  
95 modeling. *medRXiv*. 2020:2020.03.20.20038422.
- 96 12. Zahiri A, RafieeNasab S, Roohi E. Prediction of Peak and Termination of Novel Coronavirus  
97 Covid-19 Epidemic in Iran. *medRXiv*. 2020:2020.03.29.20046532.
- 98 13. Zareie B, Roshani A, Mansournia MA, Rasouli MA, Moradi G. A model for COVID-19 prediction  
99 in Iran based on China parameters. *medRXiv*. 2020:2020.03.19.20038950.
- 100 14. Zhan C, Tse CK, Lai Z, Hao T, Su J. Prediction of COVID-19 Spreading Profiles in South Korea,  
101 Italy and Iran by Data-Driven Coding. *medRXiv*. 2020:2020.03.08.20032847.

102

**Table S1. Regions and provinces of Iran.**

| <b>Region</b> | <b>Provinces</b>                                                                                                                                                    |
|---------------|---------------------------------------------------------------------------------------------------------------------------------------------------------------------|
| 1             | Qom Province (QOM), Tehran Province (TEH), Mazandaran Province (MAZ), Alborz Province (ALB), Semnan Province (SEM), Golestan Province (GOL), Qazvin Province (QAZ). |
| 2             | Esfahan (ESF), Fars (FRS), Hormozgan (HOR), Kohgiluyeh and Boyer-Ahmad (KOH), Chaharmahal and Bakhtiari (CHA), and Bushehr (BUS).                                   |
| 3             | Gilan Province (GIL), Ardabil Province (ARD), East Azerbaijan Province (AZS), West Azerbaijan Province (AZG), Kurdistan (or Kordestan) Province (KUR).              |
| 4             | Markazi (MAR), Hamedan (HAM), Khazistan (KHZ), Kermanshah (KRS), Lorestan (LOR), and Ilam (ILM).                                                                    |
| 5             | Razavi Khorasan (KHR), Sistan and Baluchestan (SIS), Yazd (YAZ), South Khorasan (KHS), Kerman (KER), and North Khorasan (KHN).                                      |

**Table S2. Daily number of new reported COVID-19 cases in Iran and its five regions.**

| Date (yyyy-mm-dd) | Iran | Region 1  | Region 2 | Region 3 | Region 4 | Region 5 |
|-------------------|------|-----------|----------|----------|----------|----------|
| 2020-02-19        | 2    | 2         | -        | -        | -        | -        |
| 2020-02-20        | 3    | 2         | -        | -        | 1        | -        |
| 2020-02-21        | 13   | 11        | -        | 2        | -        | -        |
| 2020-02-22        | 10   | 10        | -        | -        | -        | -        |
| 2020-02-23        | 15   | 12        | -        | 2        | 1        | -        |
| 2020-02-24        | 18   | 11        | 2        | 2        | 3        | -        |
| 2020-02-25        | 34   | 29        | 2        | 2        | 0        | 1        |
| 2020-02-26        | 44   | 21        | 5        | 10       | 6        | 2        |
| 2020-02-27        | 106  | 58        | 8        | 32       | 6        | 2        |
| 2020-02-28        | 143  | 98        | 10       | 32       | 3        | 0        |
| 2020-02-29        | 205  | 125       | 20       | 31       | 23       | 6        |
| 2020-03-01        | 385  | 245       | 23       | 28       | 67       | 22       |
| 2020-03-02        | 523  | 422.1805† | 20.9259† | 30.8184† | 42.1267† | 11.1281† |
| 2020-03-03        | 835  | 528.6418† | 17.0741† | 39.4146† | 59.4522† | 16.0099† |
| 2020-03-04        | 586  | 424       | 15       | 54       | 62       | 31       |
| 2020-03-05        | 591‡ | 256       | 150      | 122      | 49       | 69       |
| 2020-03-06        | 1234 | 693       | 180      | 175      | 112      | 74       |
| 2020-03-07        | 1076 | 663       | 126      | 99       | 82       | 106      |
| 2020-03-08        | 743  | 378       | 104      | 68       | 140      | 53       |
| 2020-03-09        | 595  | 265       | 89       | 119      | 92       | 30       |
| 2020-03-10        | 881  | 508       | 72       | 63       | 138      | 100      |
| 2020-03-11        | 958  | 485       | 200      | 90       | 78       | 105      |
| 2020-03-12        | 1075 | 605       | 62       | 150      | 183      | 75       |
| 2020-03-13        | 1289 | 614       | 147      | 237      | 121      | 170      |
| 2020-03-14        | 1365 | 624       | 173      | 272      | 186      | 110      |
| 2020-03-15        | 1209 | 562       | 149      | 156      | 126      | 216      |
| 2020-03-16        | 1053 | 480       | 189      | 160      | 97       | 127      |

|                   |      |     |     |     |     |     |
|-------------------|------|-----|-----|-----|-----|-----|
| <b>2020-03-17</b> | 1178 | 566 | 118 | 203 | 134 | 157 |
| <b>2020-03-18</b> | 1192 | 505 | 255 | 199 | 120 | 113 |
| <b>2020-03-19</b> | 1046 | 359 | 160 | 210 | 140 | 177 |

†The daily new cases for each of the 5 regions on March 2 and 3, 2020, were interpolated using cubic spline.

‡The reported number of the national total on March 5 does not match the sum of the 5 regions.



**Table S3.** Daily cumulative number of daily reported COVID-19 cases in Iran.

| <b>Date (yyyy-mm-dd)</b> | <b>Iran</b> | <b>Region 1</b> | <b>Region 2</b> | <b>Region 3</b> | <b>Region 4</b> | <b>Region 5</b> |
|--------------------------|-------------|-----------------|-----------------|-----------------|-----------------|-----------------|
| 2020-02-19               | 2           | 2               | -               | -               | -               | -               |
| 2020-02-20               | 5           | 4               | -               | -               | 1               | -               |
| 2020-02-21               | 18          | 15              | -               | 2               | 1               | -               |
| 2020-02-22               | 28          | 25              | -               | 2               | 1               | -               |
| 2020-02-23               | 43          | 37              | -               | 4               | 2               | -               |
| 2020-02-24               | 61          | 48              | 2               | 6               | 5               | -               |
| 2020-02-25               | 95          | 77              | 4               | 8               | 5               | 1               |
| 2020-02-26               | 139         | 98              | 9               | 18              | 11              | 3               |
| 2020-02-27               | 245         | 156             | 17              | 50              | 17              | 5               |
| 2020-02-28               | 388         | 254             | 27              | 82              | 20              | 5               |
| 2020-02-29               | 593         | 379             | 47              | 113             | 43              | 11              |
| 2020-03-01               | 978         | 624             | 70              | 141             | 110             | 33              |
| 2020-03-02               | 1501        | NR              | NR              | NR              | NR              | NR              |
| 2020-03-03               | 2336        | NR              | NR              | NR              | NR              | NR              |
| 2020-03-04               | 2922        | 1984            | 183             | 345             | 273             | 82              |
| 2020-03-05               | 3513        | 2240            | 333             | 467             | 322             | 151             |
| 2020-03-06               | 4747        | 2933            | 513             | 642             | 434             | 225             |
| 2020-03-07               | 5823        | 3596            | 639             | 741             | 516             | 331             |
| 2020-03-08               | 6566        | 3974            | 743             | 809             | 656             | 384             |
| 2020-03-09               | 7161        | 4239            | 832             | 928             | 748             | 414             |
| 2020-03-10               | 8042        | 4747            | 904             | 991             | 886             | 514             |
| 2020-03-11               | 9000        | 5232            | 1104            | 1081            | 964             | 619             |
| 2020-03-12               | 10075       | 5837            | 1166            | 1231            | 1147            | 694             |
| 2020-03-13               | 11364       | 6451            | 1313            | 1468            | 1268            | 864             |
| 2020-03-14               | 12729       | 7075            | 1486            | 1740            | 1454            | 974             |
| 2020-03-15               | 13938       | 7637            | 1635            | 1896            | 1580            | 1190            |
| 2020-03-16               | 14991       | 8117            | 1824            | 2056            | 1677            | 1317            |

|                   |       |      |      |      |      |      |
|-------------------|-------|------|------|------|------|------|
| <b>2020-03-17</b> | 16169 | 8683 | 1942 | 2259 | 1811 | 1474 |
| <b>2020-03-18</b> | 17361 | 9188 | 2197 | 2458 | 1931 | 1587 |
| <b>2020-03-19</b> | 18407 | 9547 | 2357 | 2668 | 2071 | 1764 |

NR: Not reported by the Iranian Government.

**Table S4. Method 1 (February 19 through March 1, 2020):** Estimated epidemic growth rate (95% Confidence intervals, CI), scaling parameter (95% CI) and basic reproduction number obtained via a generalized growth model.

|          | <b>Epidemic growth rate (r, 95% CI)</b> | <b>Scaling parameter, p</b> | <b>Basic reproduction number (95% CI)</b> |
|----------|-----------------------------------------|-----------------------------|-------------------------------------------|
| Iran     | 0.65 (0.56, 0.75)                       | 0.96 (0.93, 1)              | 4.4 (3.9, 4.9)                            |
| Region 1 | 0.55 (0.51, 0.65)                       | 0.99 (0.94, 1)              | 4.3 (3.8, 4.6)                            |
| Region 2 | 1.20 (0.58, 2.20)                       | 0.76 (0.52, 1)              | 3.4 (2.3, 5.0)                            |
| Region 3 | 3.00 (1.50, 5.00)                       | 0.52 (0.37, 0.69)           | 2.1 (1.7, 2.7)                            |
| Region 4 | 0.75 (0.67, 0.96)                       | 0.97 (0.87, 1)              | 5.8 (4.4, 6.4)                            |
| Region 5 | 0.83 (0.68, 1.30)                       | 0.94 (0.72, 1)              | 6.0 (3.8, 7.3)                            |

**Table S5. Method 2 (February 19 through March 1, and March 6 through 19, 2020):** Estimated epidemic doubling time (95% Confidence intervals, CI), epidemic growth rate (95% CI) and the basic (or effective) reproduction number (95% CI) obtained via Method 2. Epidemic growth rate ( $r$ ) =  $\ln(2)/$ doubling time. Reproduction number was calculated based on equation:  $R_0 = 1 + \text{growth rate} \times \text{serial interval}$ , assuming serial interval following a gamma distribution with a mean of 4.41 days and a standard deviation of 3.17 days.

|                 | Estimated epidemic doubling times (95% CI)* |                   | Epidemic growth rate (r, 95% CI) |                   | Basic Reproduction number (95% CI) § | Effective Reproduction number (95% CI) § |
|-----------------|---------------------------------------------|-------------------|----------------------------------|-------------------|--------------------------------------|------------------------------------------|
|                 | Feb 19 – Mar 1                              | Mar 6 – 19        | Feb 19 – Mar 1                   | Mar 6 – 19        | Feb 19 – Mar 1                       | Mar 6 – 19                               |
| <b>Iran</b>     | 1.20 (1.05, 1.45)                           | 5.46 (5.29, 5.65) | 0.58 (0.48, 0.66)                | 0.13 (0.12, 0.13) | 3.50 (1.28, 8.14)                    | 1.55 (1.06, 2.57)                        |
| <b>Region 1</b> | 1.32 (1.16, 1.61)                           | 6.04 (5.80, 6.29) | 0.53 (0.43, 0.60)                | 0.11 (0.11, 0.12) | 3.28 (1.26, 7.59)                    | 1.50 (1.06, 2.42)                        |
| <b>Region 2</b> | 1.12 (0.87, 1.59)                           | 5.71 (5.32, 6.04) | 0.62 (0.44, 0.80)                | 0.12 (0.11, 0.13) | 3.69 (1.29, 8.84)                    | 1.53 (1.06, 2.50)                        |
| <b>Region 3</b> | 1.38 (1.12, 1.78)                           | 6.23 (5.86, 6.51) | 0.50 (0.39, 0.62)                | 0.11 (0.11, 0.12) | 3.17 (1.24, 7.24)                    | 1.48 (1.06, 2.37)                        |
| <b>Region 4</b> | 1.67 (1.43, 2.30)                           | 5.19 (4.58, 5.79) | 0.41 (0.30, 0.49)                | 0.13 (0.12, 0.15) | 2.79 (1.20, 6.15)                    | 1.58 (1.07, 2.65)                        |
| <b>Region 5</b> | 1.13 (0.92, 1.61)                           | 3.92 (3.54, 4.32) | 0.62 (0.43, 0.75)                | 0.18 (0.16, 0.20) | 3.66 (1.30, 8.79)                    | 1.77 (1.09, 3.19)                        |

\*Harmonic mean of the arithmetic means of 10,000 sets of simulated epidemic doubling times. §Calculated based on the 10,000 arithmetic means of 10000 sets of simulated epidemic doubling times and 10,000 random numbers drawn from a gamma distribution with a mean serial interval of 4.41 days (SD: 3.17 days).

**Table S6: Manuscript pre-prints on the COVID-19 epidemic in Iran fit to Iranian official reports available on medRxiv as of April 2, 2020**

| <b>Papers</b>                   | <b>medRxiv pre-print version as of Apr 2, 2020</b> | <b>Iranian official COVID-19 reports*: time range</b> | <b>Other data sources</b>                                | <b>Methods</b>                                                                                                                               | <b>Basic reproduction number</b>               | <b>Effective reproduction number after social distancing implemented</b> |
|---------------------------------|----------------------------------------------------|-------------------------------------------------------|----------------------------------------------------------|----------------------------------------------------------------------------------------------------------------------------------------------|------------------------------------------------|--------------------------------------------------------------------------|
| Ahmadi et al. (9)               | Pre-print version 2                                | February 19 through March 19, 2020                    | Not applied                                              | Logistic differential equation, Gompertz differential equation, Von Bertalanffy's differential growth equation, Cubic Polynomial Polynomials | 4.7                                            | 1.75 (Gompertz)                                                          |
| Ghaffarzadegan & Rahmandad (10) | Pre-print version 1                                | February 19 through March 19, 2020                    | unofficial reports; and international media news reports | Compartmental (SEIR) model fit to reported data                                                                                              | 2.72 (90% CI, 2.57, 2.92)                      | <1 by March 20, 2020                                                     |
| Sahafizadeh and Sartoli (11)    | Pre-print version 2                                | February 22 through March 18, 2020                    | Not applied                                              | Compartmental (SIR) model fit to data                                                                                                        | 4.86 (1st week, with Feb 19, 2020 as day zero) | 4.5 (2nd week); 4.29 (3 <sup>rd</sup> week); 2.1 (4 <sup>th</sup> week)  |
| Zahiri et al. (12)              | Pre-print version 1                                | February 19 through March 24, 2020                    | China's official COVID-19 reports                        | Compartmental (SIR) model fit to data; also fit Iranian data to the epidemic curve in China                                                  | Not reported                                   | Not reported                                                             |
| Zareie et al.(13)               | Pre-print version 1                                | January 22 <sup>†</sup> to March 8, 2020              | China's official COVID-19 reports                        | Compartmental (SIR) model fit to China's data to obtain parameter estimates and then applied to Iran's data                                  | Not reported                                   | Not reported                                                             |
| Zhan et al.(14)                 | Pre-print version 1                                | February 19 through March 6, 2020                     | China's official COVID-19 reports                        | Compartmental (SEIR) model fit to epidemic data in 367 cities in China to generate historical profiles of epidemics (sets of                 | Not reported                                   | Not reported                                                             |

---

parameter values) that were compared to observed data in South Korea, Italy and Iran to make predictions based on the best-fit epidemic profiles of the SEIR model

---

Notes: Manuscript pre-prints uploaded to medRxiv server (medrxiv.org) are working papers and they are not (or have not yet been) peer-reviewed.

\* Official daily reports of deaths, recovered and cumulative number of infected individuals from the Iranian Ministry of Health and Medical Education. †The abstract of Zareie et al. mentioned “January 22”; however, the first confirmed cases of Iran were reported on February 19, 2020.

**Figure S1.** Cumulative incidence curve of Iran and its Regions 1 to 5. The data for the five regions on March 2 and 3, 2020 were imputed.

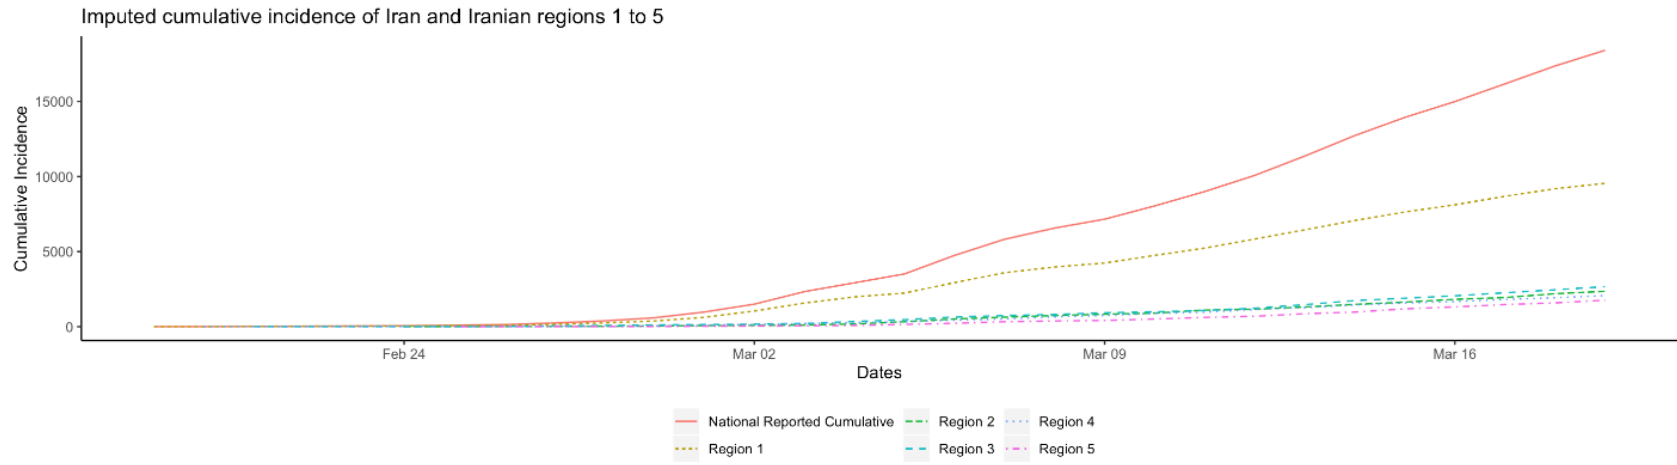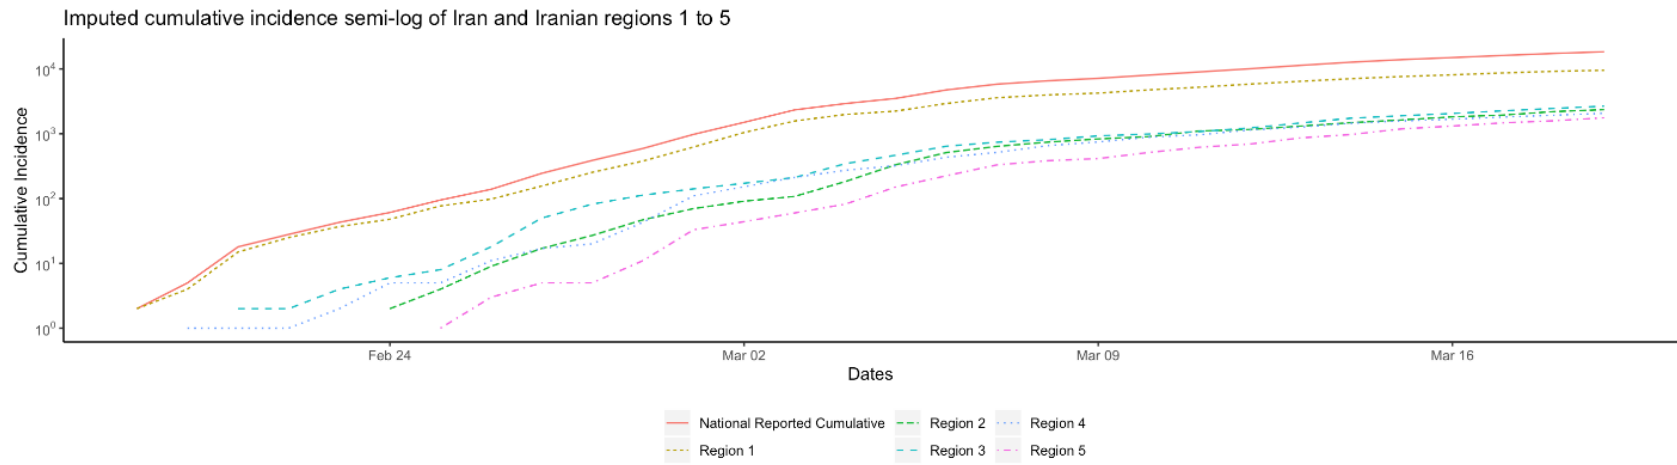

**Figure S2: Method 1: Region 1.** The mean basic reproduction number of COVID-19 in Region 1, Iran, with 95% confidence interval. Estimates for growth rate,  $r$ , and the scaling of the growth rate parameter,  $p$ , are also provided. The plot in the lower panel depicts the fit of the Generalized Growth Model to the Iranian data assuming Poisson error structure as of March 1, 2020.

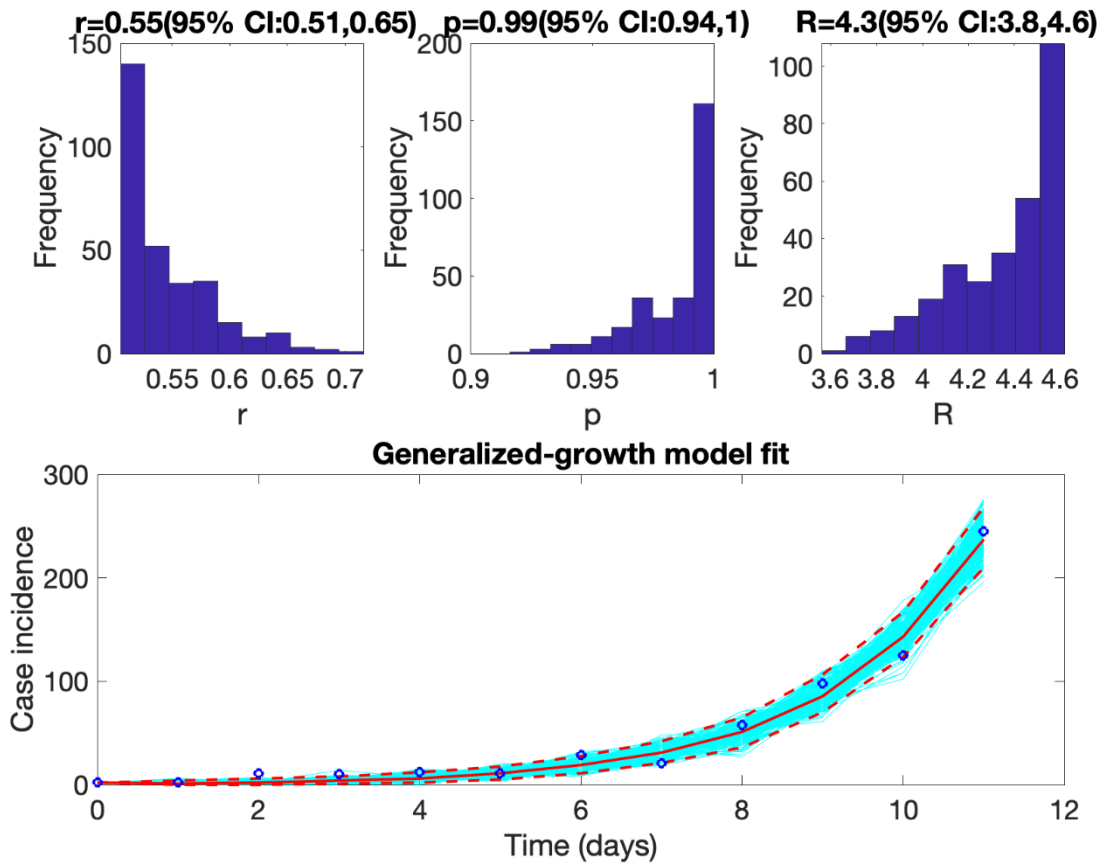



**Figure S3: Method 1: Region 2.** The mean basic reproduction number of COVID-19 in Region 2, Iran, with 95% confidence interval. Estimates for growth rate,  $r$ , and the scaling of the growth rate parameter,  $p$ , are also provided. The plot in the lower panel depicts the fit of the Generalized Growth Model to the Iranian data assuming Poisson error structure as of March 1, 2020.

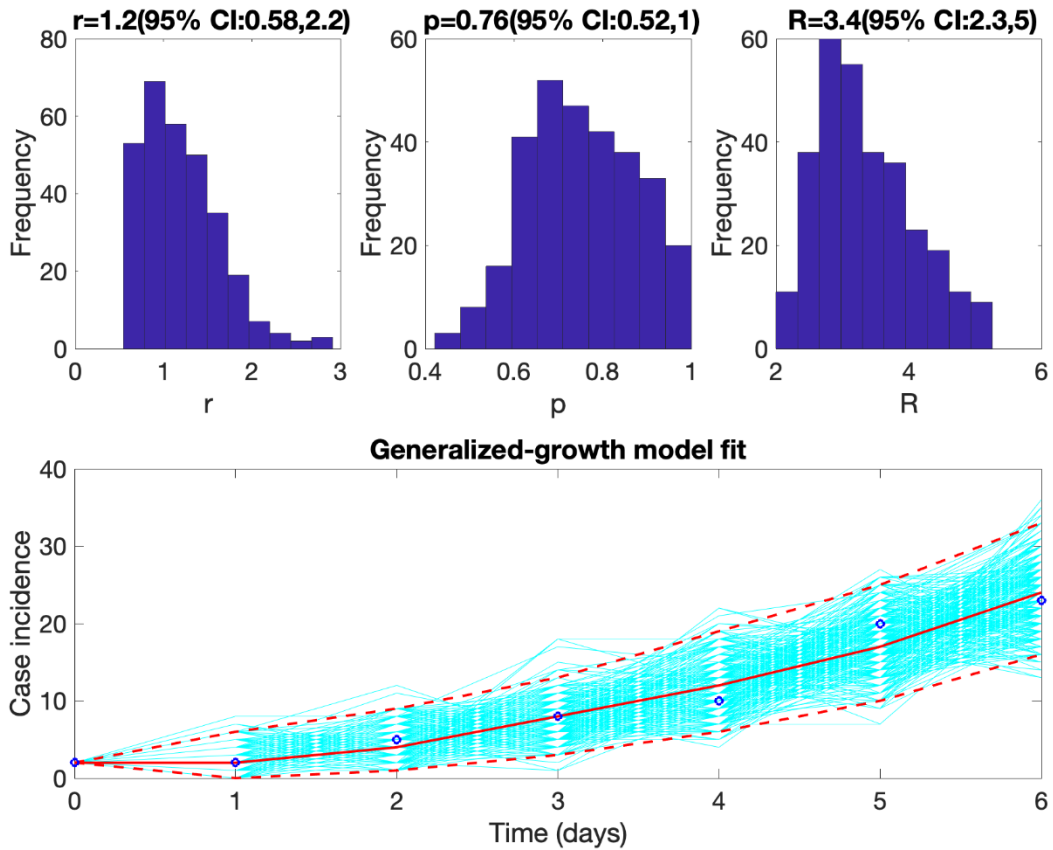

**Figure S4: Method 1: Region 3.** The mean basic reproduction number of COVID-19 in Region 3, Iran, with 95% confidence interval. Estimates for growth rate,  $r$ , and the scaling of the growth rate parameter,  $p$ , are also provided. The plot in the lower panel depicts the fit of the Generalized Growth Model to the Iranian data assuming Poisson error structure as of March 1, 2020.

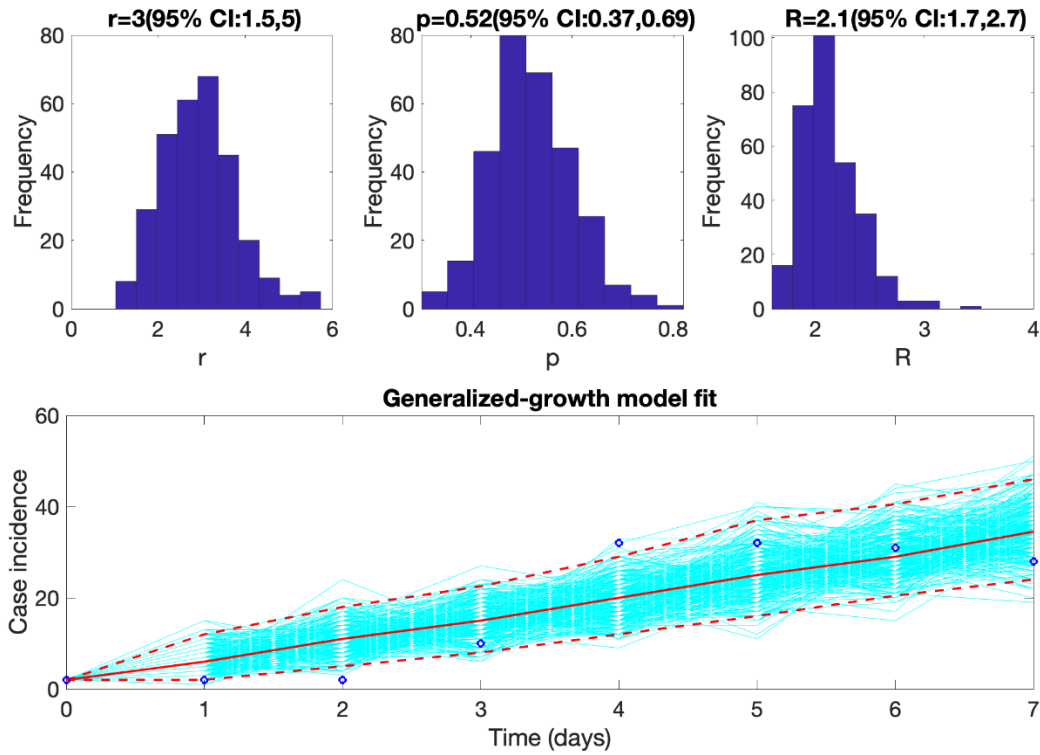

**Figure S5: Method 1: Region 4.** The mean basic reproduction number of COVID-19 in Region 4, Iran, with 95% confidence interval. Estimates for growth rate,  $r$ , and the scaling of the growth rate parameter,  $p$ , are also provided. The plot in the lower panel depicts the fit of the Generalized Growth Model to the Iranian data assuming Poisson error structure as of March 1, 2020.

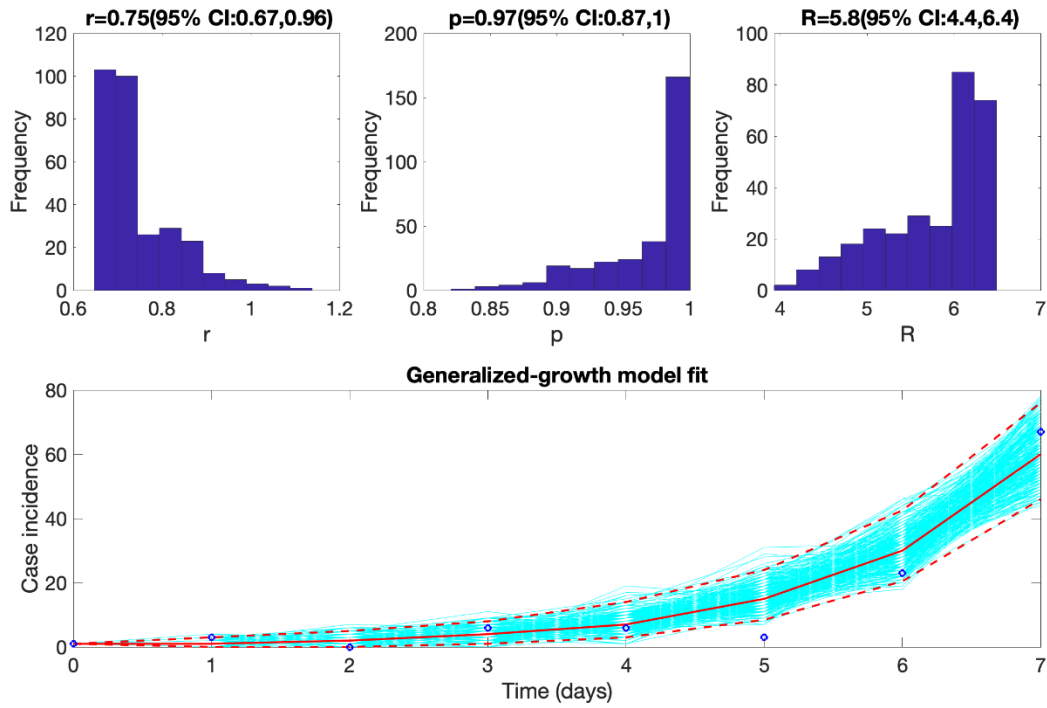

**Figure S6: Method 1: Region 5.** The mean basic reproduction number of COVID-19 in Region 5, Iran, with 95% confidence interval. Estimates for growth rate,  $r$ , and the scaling of the growth rate parameter,  $p$ , are also provided. The plot in the lower panel depicts the fit of the Generalized Growth Model to the Iranian data assuming Poisson error structure as of March 1, 2020.

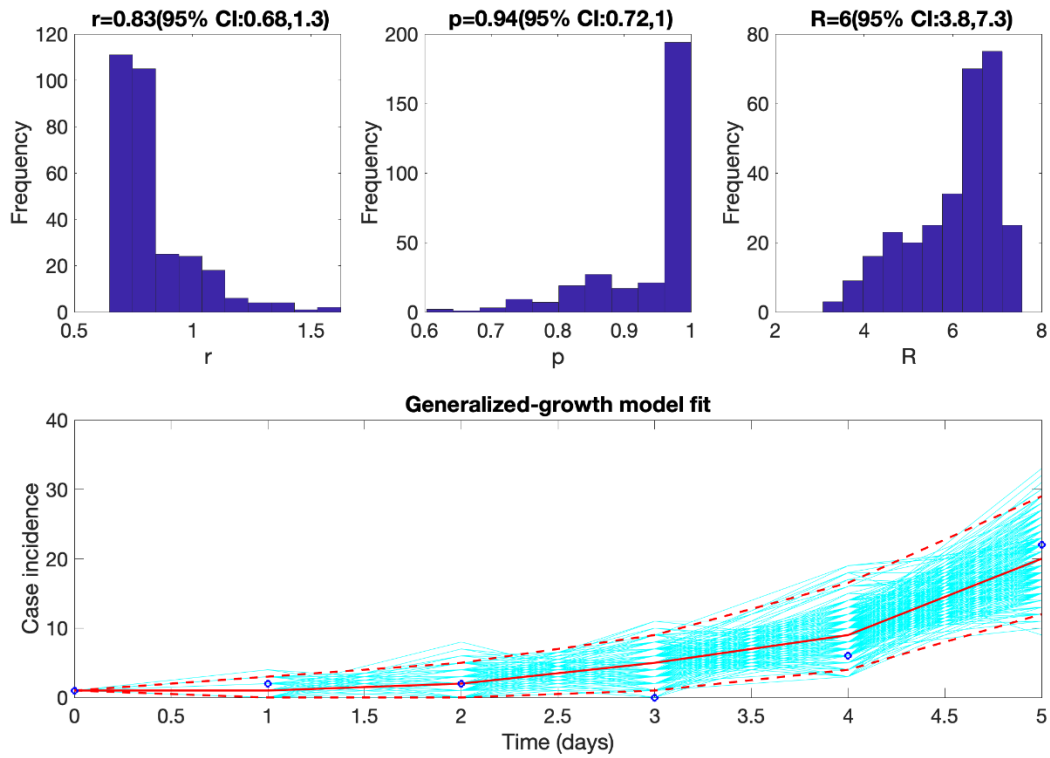

**Figure S7. Method 2: Part 1 (February 19 through March 1, 2020):** The COVID-19 epidemic doubling time (black diamond) and the harmonic mean of the arithmetic means of 10,000 estimates with 95% confidence intervals (circle and bar) of Iran and its five regions.

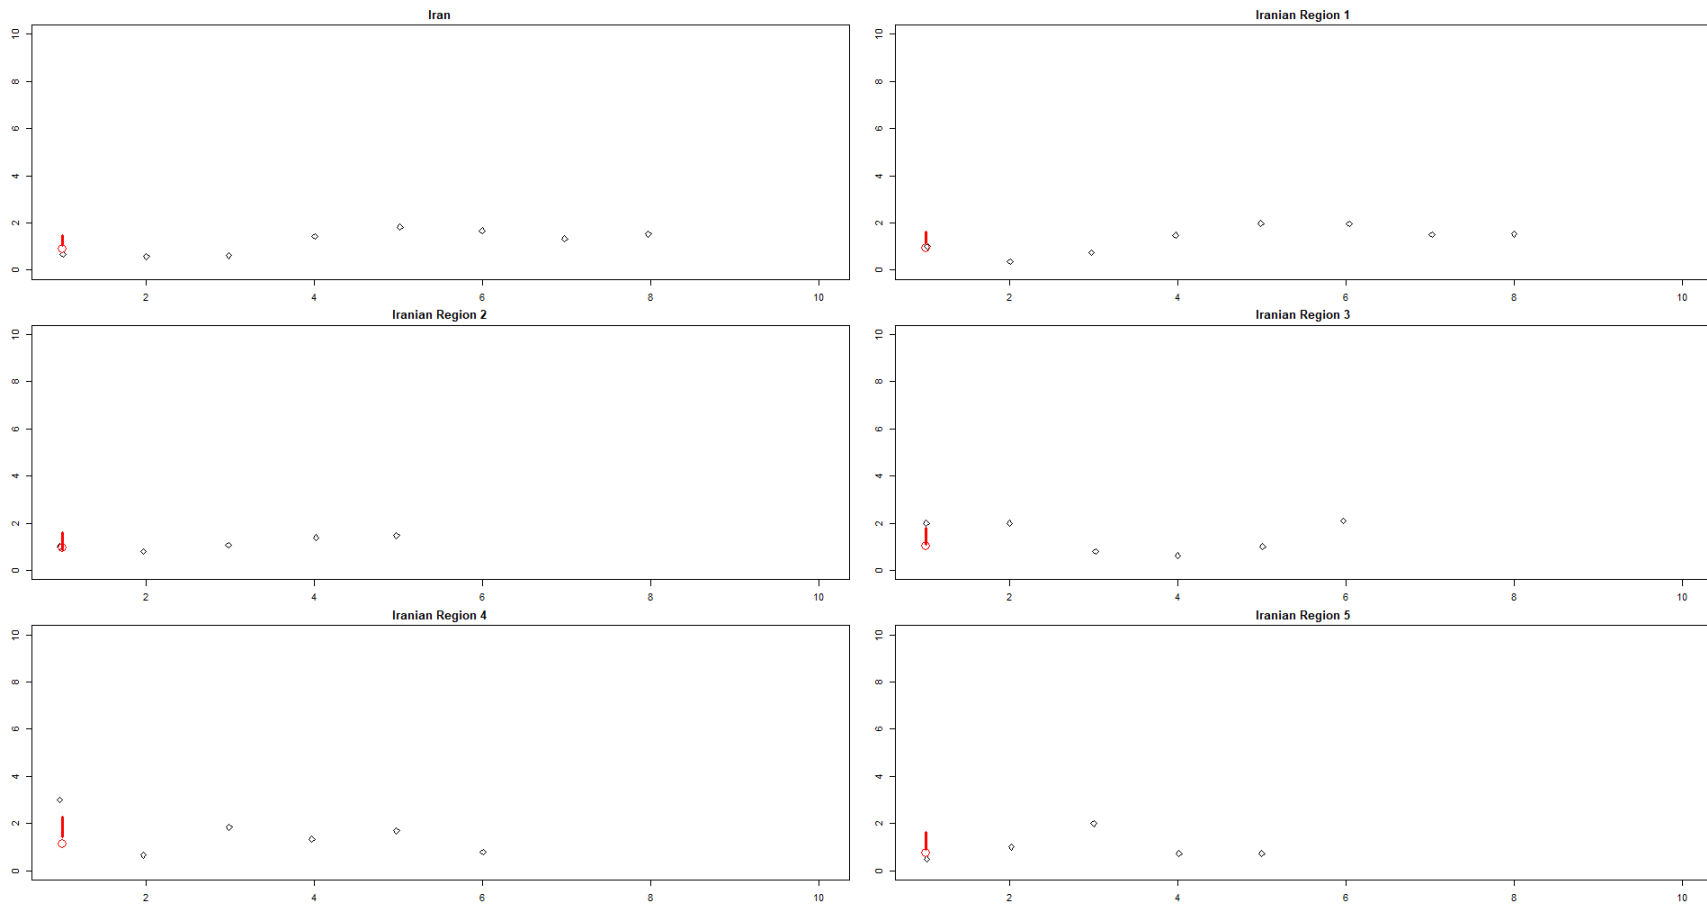

**Figure S8. Method 2: Part 2 (March 6 through 19, 2020):** The COVID-19 epidemic doubling time (black diamond) and the harmonic mean of the arithmetic means of 10,000 estimates with 95% confidence intervals (circle and bar) of Iran and its five regions.

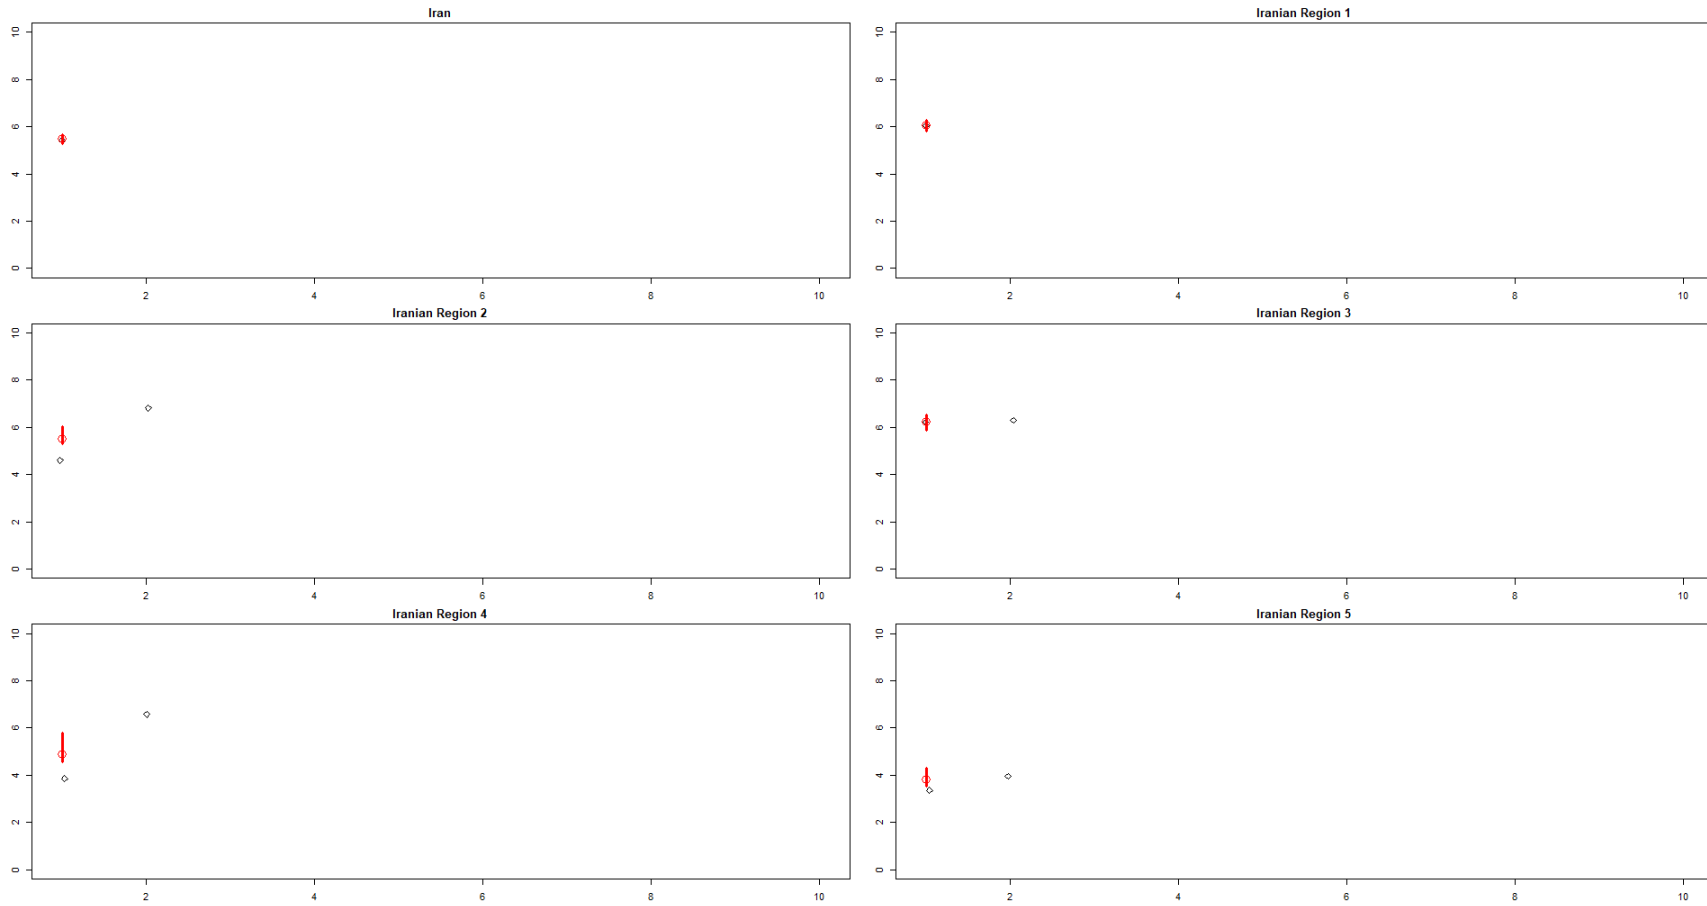

Authors' contribution:

Conceptualization of the project: I. C. H. Fung and G. Chowell

MATLAB codes: G. Chowell

R codes: K. Muniz-Rodriguez and I. C. H. Fung

Data analysis (Method 1): G. Chowell

Data analysis (Method 2): K. Muniz-Rodriguez and I. C. H. Fung

Writing the first draft of the manuscript: I. C. H. Fung

Writing the section on Method 1 in Technical Appendix: G. Chowell

Manuscript editing: G. Chowell, I. C. H. Fung and K. Muniz-Rodriguez

Downloading Iranian official press releases and double-checking data: S. R. Ferdosi

Downloading news reports about COVID-19 epidemic in Iran: S. R. Ferdosi, S. K. Ofori

International COVID-19 epidemic data and press release curation team at Georgia Southern University: K.

Muniz-Rodriguez, S. K. Ofori

International COVID-19 epidemic data curation team at Georgia State University: Y. Lee, A. Tariq
